# Supplementary figures and images for: Comparative Transcriptomics in Ebola Makona-Infected Ferrets, Nonhuman Primates, and Humans
Source: PubMed Central journal article supplement — J Infect Dis. 2018 Aug 23;218(Suppl 5):S486–95. doi: 10.1093/infdis/jiy455 (PMC6249602; doi:10.1093/infdis/jiy455), 2018-08-23

# Ferret PCA: Before Filtering

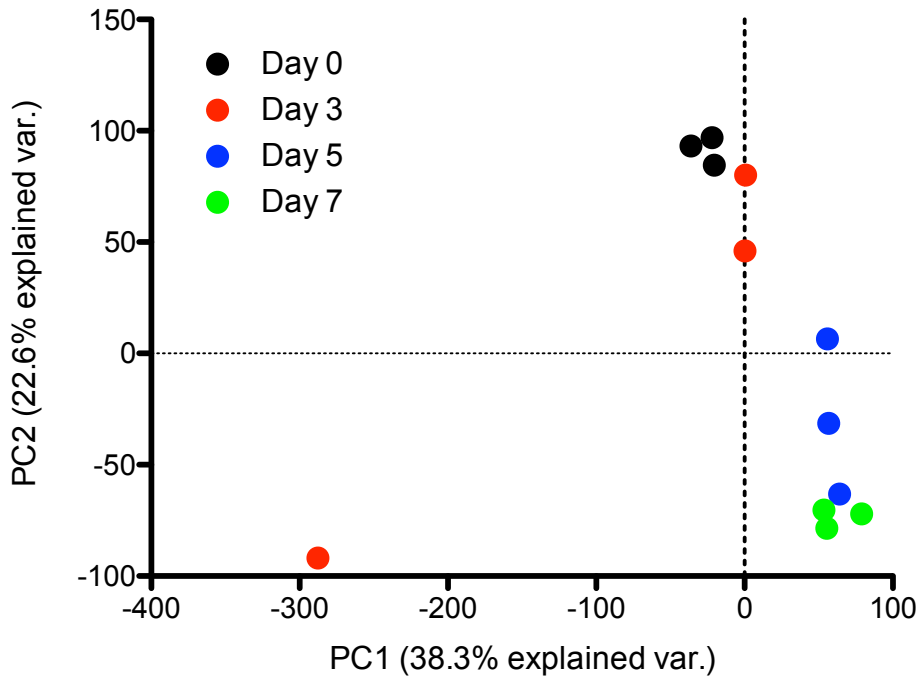

Supplement: jiy455_suppl_supplementary_figure_1.pdf [file jiy455_suppl_supplementary_figure_1.pdf]

A

Day 5pi Conserved

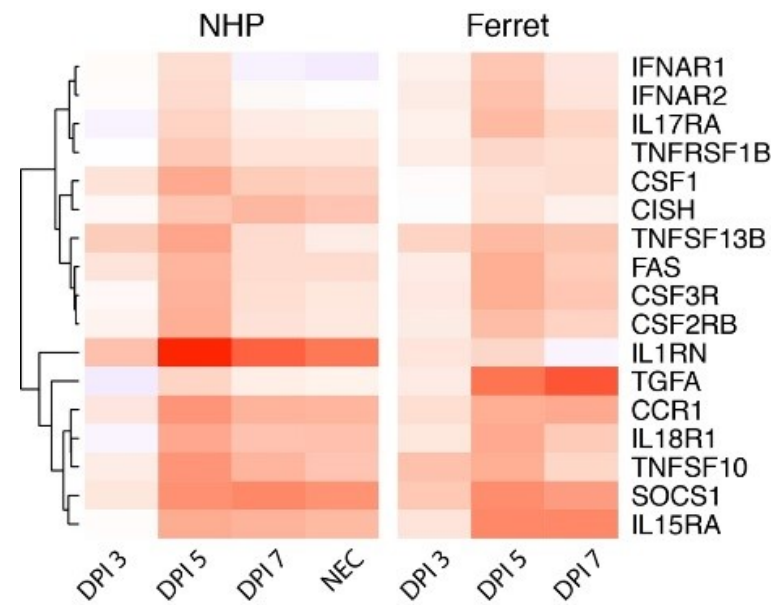

B

Day 7pi Conserved

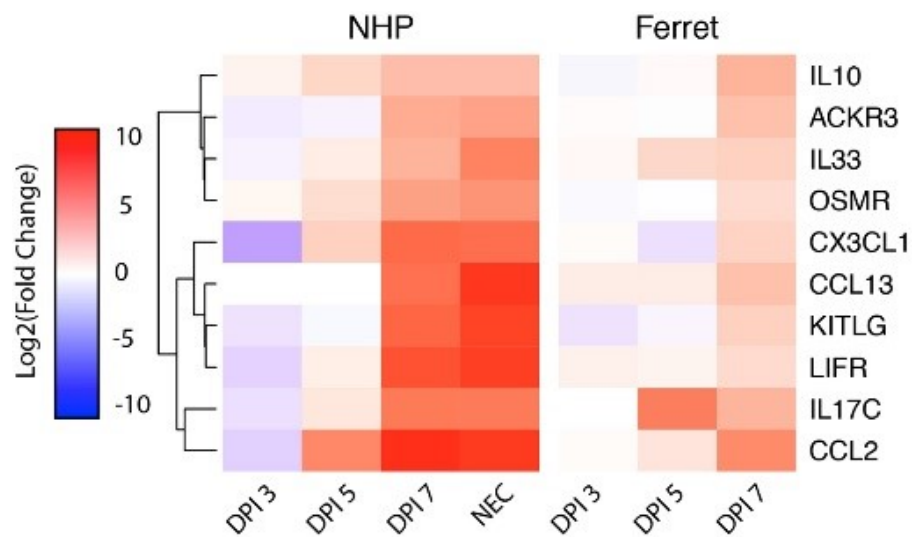

C

NHP only Cytokines

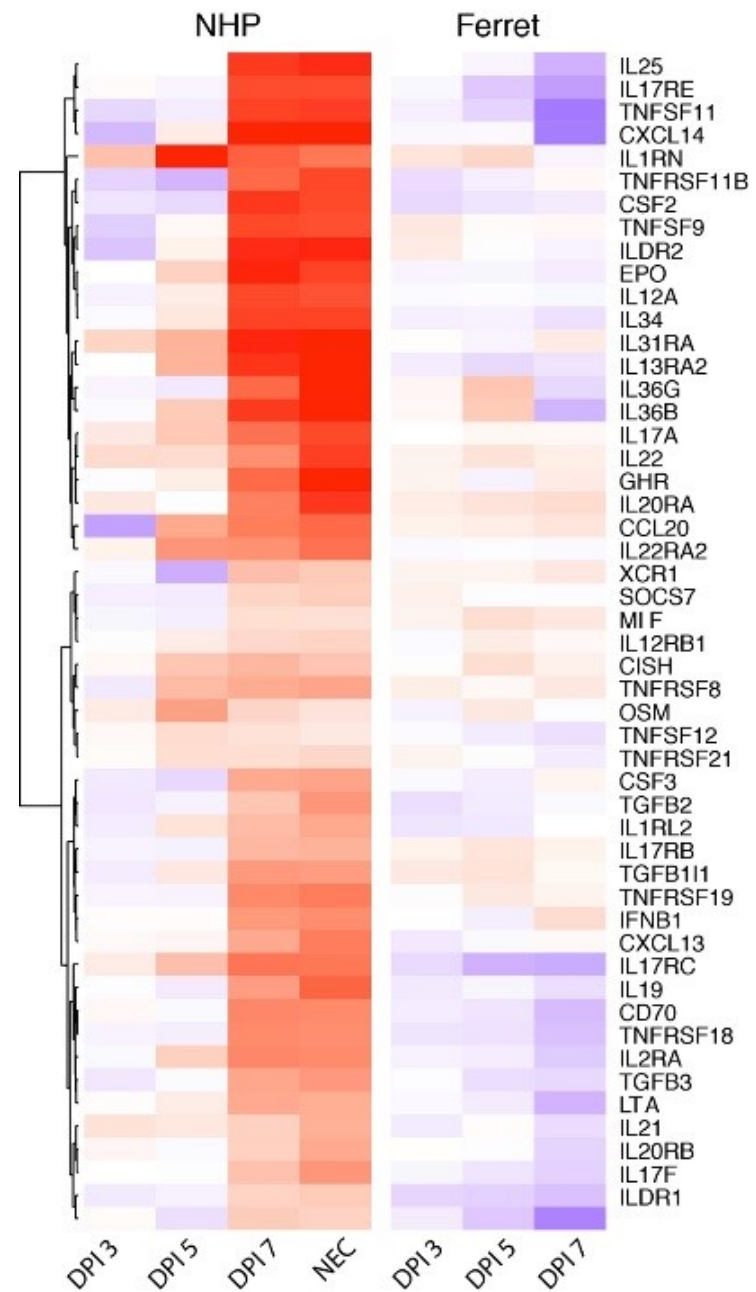

Supplement: jiy455_suppl_supplementary_figure_2.pdf [file jiy455_suppl_supplementary_figure_2.pdf]
